# Supplementary material for: Designing a Value-Added Tax-integrated recovery scheme for Abandoned, Lost or Discarded Fishing Gear: Science–policy integration and decision-support for Vietnam’s fisheries
Source: Research Square preprint supplement (doi:10.21203/rs.3.rs-8329512/v1), 2025-12-22
Supplement: Supplementary file 1 [file 2eb8861185e7fa3e9aef1dfc.pdf]

# Appendix A Supplementary Information (SI)

## Content

|                                                                                           |   |
|-------------------------------------------------------------------------------------------|---|
| A1. Summary Results of the REVFIN Survey Questionnaire Sample and Methodology.....        | 3 |
| A2. Key Survey Results .....                                                              | 3 |
| Part 1: General Information & Gear Inventory .....                                        | 3 |
| Q16. Fundamental information of fishing gear .....                                        | 3 |
| Q20. Have you found any abandoned/lost fishing gear during the sailing? .....             | 3 |
| Q21. If yes, what did you do with it? .....                                               | 4 |
| Q23. Have you ever encountered plastic litter in your nets? If yes, with which.....       | 4 |
| Part 2: Economic Aspects.....                                                             | 4 |
| S30. What is the economic disadvantage of recycling networks?.....                        | 4 |
| S33. Are measures in place to recover lost/discarded fishing gear? .....                  | 4 |
| Part 4: End-of-Life and Behavioral Analysis .....                                         | 5 |
| L27. Would you be willing to collect nets to bring back to shore? .....                   | 5 |
| L28. Is there a designated storage area on the boat for end-of-life fishing gear? .....   | 5 |
| L29. How is end-of-life fishing gear handled while on the boat? .....                     | 5 |
| L30 In your opinion, which is the most appropriate program to collect fishing gear? ..... | 6 |
| L33. Where is end-of-life fishing gear sent to while on land/port? .....                  | 6 |
| L35. If for change, how will damaged/discarded fishing gear be sold? ....                 | 7 |

|                                              |   |
|----------------------------------------------|---|
| A3. Market Price for Spent Fishing Gear..... | 7 |
| A4. Barriers and Preferences .....           | 8 |
| A5. Additional Notes .....                   | 8 |

## A1. Summary Results of the REVFIN Survey Questionnaire Sample and Methodology

- **Number of respondents:** 1525

- **Interview method:** Face-to-face structured survey as part of the REVFIN project, covering three coastal provinces in Vietnam.

## A2. Key Survey Results

### Part 1: General Information & Gear Inventory

#### Q16. Fundamental information of fishing gear

|   | Fishing gears            | Unit   | Quantity $\pm$ SD         | Number of answers: Quantity | Investment cost (million VND) $\pm$ SD | Number of answers: Investment costs |
|---|--------------------------|--------|---------------------------|-----------------------------|----------------------------------------|-------------------------------------|
| 1 | Main nets/<br>Cover nets | kg     | 326.5<br>( $\pm 976.7$ )  | 1429                        | 58.65<br>( $\pm 146.15$ )              | 1429                                |
| 2 | Rope                     | kg     | 224.2<br>( $\pm 524.6$ )  | 1221                        | 16.16<br>( $\pm 47.87$ )               | 1225                                |
| 3 | Buoy                     | Pieces | 5527<br>( $\pm 9501$ )    | 1131                        | 8.61<br>( $\pm 35.66$ )                | 1125                                |
| 4 | Others:                  |        | 599.5<br>( $\pm 2026.5$ ) | 793                         | 47.22<br>$\pm 148.96$                  | 818                                 |

#### Q20. Have you found any abandoned/lost fishing gear during the sailing?

N(answers) = 1525

| Anwer                 | Never (1) | Rarely (2) | Sometimes (3) | Often (4) | Always (5) |
|-----------------------|-----------|------------|---------------|-----------|------------|
| Number of respondents | 237       | 425        | 664           | 178       | 1          |

**Q21. If yes, what did you do with it?**

N(answers) = 1525

| Anwer                 | Take them | Left them in the water |
|-----------------------|-----------|------------------------|
| Number of respondents | 862       | 663                    |

**Q23. Have you ever encountered plastic litter in your nets? If yes, with which**

N(answers) = 1525

| Anwer                 | Fishing gears(1) | Plastic bag (2) | Bottle (3) | Nets (4) | Others (5) |
|-----------------------|------------------|-----------------|------------|----------|------------|
| Number of respondents | 645              | 1322            | 991        | 658      | 153        |

**Part 2: Economic Aspects****S30. What is the economic disadvantage of recycling networks?**

N(answers) = 1525

| Anwer                 | Taxes (1) | Fees (2) | Transport (3) | other (4) | No answer |
|-----------------------|-----------|----------|---------------|-----------|-----------|
| Number of respondents | 0         | 67       | 423           | 674       | 361       |

**S33. Are measures in place to recover lost/discarded fishing gear?**

N(answers) = 1525

| Anwer                 | Yes (1) | No (0) |
|-----------------------|---------|--------|
| Number of respondents | 71      | 1454   |

#### Part 4: End-of-Life and Behavioral Analysis

##### **L27. Would you be willing to collect nets to bring back to shore?**

N(answers) = 1525

| Anwer                 | Yes  | Yes, if there is an incentive mechanism | No |
|-----------------------|------|-----------------------------------------|----|
| Number of respondents | 1462 | 55                                      | 8  |

##### **L28. Is there a designated storage area on the boat for end-of-life fishing gear?**

N(answers) = 1525

| Anwer                 | Yes (1) | No (0) |
|-----------------------|---------|--------|
| Number of respondents | 1390    | 15     |

##### **L29. How is end-of-life fishing gear handled while on the boat?**

N(answers) = 1525

|   | Handling while on boat | Percentage (%) | Number of respondents* |
|---|------------------------|----------------|------------------------|
| 1 | Gather on board        | 97.79          | 1511                   |
| 2 | Thrown into the sea    | 1.45           | 67                     |
| 3 | Others                 | 0.76           | 28                     |

\*For this question multiple answers were allowed.

**L30 In your opinion, which is the most appropriate program to collect fishing gear?**

N(answers) = 1524

| Anwer                 | Exchange | Exemption | Buyback |
|-----------------------|----------|-----------|---------|
| Number of respondents | 898      | 2         | 623     |

**L33. Where is end-of-life fishing gear sent to while on land/port?**

N(answers) = 1524

|   | Handling while on land/port         | Average Proportion of Fishing Gear handled this path ( $\pm$ SD) (%) |
|---|-------------------------------------|----------------------------------------------------------------------|
| 1 | Garbage collection area at the port | 4.27 ( $\pm$ 17.33)                                                  |
| 2 | Public recycle bin                  | 1.62 ( $\pm$ 9.79)                                                   |
| 3 | Anywhere                            | 0.43 ( $\pm$ 4.14)                                                   |
| 4 | For change                          | 74.42 ( $\pm$ 37.62)                                                 |
| 5 | Reuse/recycling                     | 15.96 ( $\pm$ 29.42)                                                 |
| 6 | Incineration                        | 1.72 ( $\pm$ 11.13)                                                  |
| 7 | Others                              | 1.44 ( $\pm$ 10.66)                                                  |

|   | Handling while on land/port         | Number of respondents using this path | Ratio  |
|---|-------------------------------------|---------------------------------------|--------|
| 1 | Garbage collection area at the port | 117                                   | 7.67%  |
| 2 | Public recycle bin                  | 58                                    | 3.80%  |
| 3 | Anywhere                            | 26                                    | 1.70%  |
| 4 | For change                          | 1362                                  | 89.38% |
| 5 | Reuse/recycling                     | 420                                   | 27.54% |
| 6 | Incineration                        | 48                                    | 3.14%  |
| 7 | Others                              | 30                                    | 1.97%  |

### L35. If for change, how will damaged/discarded fishing gear be sold?

N(answers) = 1467

|   | Handling while on land/port                       | Number of respondents using this path | Ratio |
|---|---------------------------------------------------|---------------------------------------|-------|
| 1 | Sell at the ship to retail buyers                 | 368                                   | 23.0% |
| 2 | Bring the discarded fishing gear to retail buyers | 962                                   | 65.5% |
| 3 | Sell directly to scrap collection centers         | 188                                   | 12.8% |

## A3. Market Price for Spent Fishing Gear

### - Informal market price for end-of-life nets:

- PE nets: about 6000 VND/kg
- PA nets: about 8000 VND/kg
- Ropes: about 4000 VND/kg

- **Average annual replacement cost for nets lost by seabed snagging:** 28.33 million VND (sample mean; N=1196).

## A4. Barriers and Preferences

- Top barriers to returning ALDFG: Transport costs, lack of infrastructure, and “other” (no specification). Taxes/fees are rarely a concern.
- Preferred return system: “For change” or “exchange” with cash or direct value received is strongly favored, followed by buy-back; exemption schemes are very rare among stated preferences.

## A5. Additional Notes

- Survey administered by trained enumerators to minimize literacy and reporting bias.
- Data forms the empirical basis for market incentive calculations and policy modeling in the main paper.
